1     **The impact of the COVID-19 pandemic on hospital services for patients with cardiac diseases: a**  
2                                                                     **scoping review**

3  
4     **Authors:**

5     Mats de Lange \* <sup>1</sup>, MD

6     Ana Sofia Carvalho \* <sup>1,2</sup>, MD

7     Óscar Brito Fernandes <sup>2,3</sup>, MSc, MEd

8     Hester Lingsma <sup>2</sup>, PhD

9     Niek Klazinga <sup>1</sup>, MD, PhD

10    Dionne Kringos <sup>1</sup>, MSc, PhD

11

12    \* Co-first authors

13

14

15    <sup>1</sup> Department of Public and Occupational Health, Amsterdam Public Health research institute,  
16    Amsterdam UMC, University of Amsterdam, Meibergdreef 9, 1105 AZ Amsterdam, The Netherlands

17    <sup>2</sup> Department of Public Health, Erasmus University Medical Center, Postbus, 3000 CA Rotterdam, The  
18    Netherlands

19    <sup>3</sup> Department of Health Economics, Corvinus University of Budapest, Fővám tér 8, H-1093, Budapest,  
20    Hungary

21

22

23

24    **Address for correspondence:**

25    Ana Sofia Carvalho

26    Department of Public Health,

27    Erasmus University Medical Center,

28    Postbus, 3000 CA Rotterdam

29    The Netherlands

30    E: asofia.dc@gmail.com

31    T: +351916303458

32

33

## Abstract

**Aim:** To assess the impact of the COVID-19 pandemic on hospital care for cardiac patients.

**Methods and results:** Scoping review, including studies with empirical data on changes in the use of health services measured by performance indicators during January - June 2020. Database searches yielded 6277 articles, of which 838 articles met the inclusion criteria during initial screening. After full-text screening, 94 articles were considered for data extraction. In total, 1637 indicators were retrieved, showing large variation in the indicators and their definitions. Most of the indicators that provided information on changes in number of admissions (n=118, 88%) signalled a decrease in admissions; 88% (n=15) of the indicators showed patients' delayed presentation and 40% (n=54) showed patients in a worse clinical condition. A reduction in diagnostic and treatment procedures was signalled by 95% (n=18) and 81% (n=64) of the indicators reporting on cardiac procedures, respectively. Length of stay decreased in 58% (n=21) of the indicators and acute coronary syndromes treatment times increased in 61% (n=65) of the indicators. Outpatient activity decreased in 94% (n=17) of the indicators related with outpatient care, whereas telehealth utilization increased in 100% (n=6). Outcomes worsened in 40% (n=35) of the indicators, and mortality rates increased in 52% (n=31).

**Conclusion:** All phases of the hospital cardiac care pathway were affected. This information could support the planning of care during the ongoing pandemic and in future events. Furthermore, to ensure continuity of care during crises, fostering the use of standardised indicators is paramount.

### Keywords:

- 1- Acute coronary syndrome
- 2- Cardiovascular disease
- 3- Quality of health care
- 4- Quality indicators
- 5- Continuity of care

## 1 **Introduction**

2 As of 14 November 2021, the virus causing COVID-19 disease, SARS-CoV-2, has infected 253 million  
3 people globally and caused 5.1 million deaths (1-3). Governments have implemented many  
4 nonpharmaceutical interventions (NPIs) to mitigate the spread of the SARS-CoV-2 virus (4) in tandem  
5 with the rollout of vaccination programmes (5).

6 During the pandemic, concerns started to arise that the increasing number of patients diagnosed with  
7 COVID-19 would exceed hospital capacity and overwhelm healthcare systems (6). Therefore, in  
8 addition to NPIs and vaccination programmes, the use of health resources for non-COVID care was  
9 minimized and elective procedures and appointments were postponed (7,8). The World Health  
10 Organisation (WHO) has been calling for attention to the impact of COVID-19 on health care services  
11 for patients with non-communicable diseases (NCDs) (9), which seems to be severe and involving  
12 multiple clinical areas (10-15). A reduction of healthcare utilization for non-COVID conditions and an  
13 increase in case severity were already signalled during the first phase of the pandemic (16,17). Medical  
14 professionals also drew attention to people avoiding or delaying care out of fear of getting infected  
15 (18,19).

16 Cardiac care has often been mentioned as being affected by the COVID-19 pandemic (20,21). According  
17 to the WHO, cardiovascular diseases, which include cardiac diseases, are the leading cause of death  
18 globally (22). Before the pandemic, a decelerating pace in the improvement of cardiovascular disease  
19 mortality was already identified as a major contributor to the slowdown of life expectancy gains in  
20 several Organisation for Economic Co-operation and Development (OECD) member countries (23). The  
21 continuity of care for patients with cardiac diseases during crisis is a major concern among healthcare  
22 providers (20,24), who seek to strengthen referrals and care pathways, and establishing and maintaining  
23 novel models of care. Given the burden of cardiac diseases in healthcare systems globally (22,23),  
24 attention for the impact of the COVID-19 pandemic on cardiology patients is justified. Previous studies  
25 noticed a decrease in patients presenting with (acute) cardiac conditions and mentioned delays in those  
26 patients who eventually did present for hospital care (25-27), which could lead to worse clinical  
27 outcomes (28).

1 In a relatively short period, large amounts of scientific evidence have become available on the impact  
2 of the pandemic on patients with cardiac diseases in varying countries. This literature is scattered, which  
3 makes it difficult to draw conclusions regarding the impact on cardiac care delivery and the use of data  
4 to steer health care services delivery improvements during the current pandemic and future public health  
5 crises. Hence, reviewing the existing literature and quantifying the magnitude of this impact helps to  
6 systematize, synthesize, and consolidate the evidence, and to formulate recommendations for policy and  
7 practice.

8 This scoping review is part of a larger project that focuses on performance indicators used for a range  
9 of clinical areas during the COVID-19 pandemic. In this study, we aim to assess the impact of the  
10 pandemic on hospital care for cardiac patients in OECD countries, focusing on the different phases of  
11 the hospital cardiac care pathway (admission, diagnosis, treatment, outpatient care, outcomes).

12

## 1 **Methods**

2

3 We pursued a scoping review methodology, considering the extensive number of scientific articles, their  
4 heterogeneous character, and the lack of a clear and structured overview of the large sums of literature  
5 that have become available on the impact of the pandemic on patients with cardiac conditions. A scoping  
6 review can be used to examine emerging evidence and give an overview of the literature and studies  
7 available on a certain theme (29). We followed the methodological framework developed by Arksey  
8 and O'Malley(30), further developed by Levac et al (31), and the PRISMA extension for scoping  
9 reviews to report our methodology (32) (Supplementary material S1).

10

### 11 *Search strategy*

12 An initial search in MEDLINE database was performed to get an overview of the number of potentially  
13 relevant articles for this study. Given the large number of articles, the MEDLINE and Embase databases  
14 were selected to search for this scoping review, as we considered them to sufficiently cover the literature  
15 related with delivery of health care services. Pilot searches were conducted to identify a list of suitable  
16 search terms. A medical research librarian was consulted to improve the search strategy and adapt it to  
17 both databases. The final search strategy included the following key terms and synonyms: COVID-19,  
18 pandemic, non-communicable disease, chronic disease, performance indicator, healthcare quality,  
19 healthcare utilization, healthcare delivery and other closely related terms. The full search strategy for  
20 Embase and MEDLINE can be found in Supplementary material S2. The comprehensive search was  
21 conducted by the research librarian on 17-03-2021. No limitations were set regarding language or year  
22 of publication. Duplicates were removed using EndNote software. Additional articles of relevance were  
23 added by hand-searching the reference lists of the included studies.

24

25

26

## 1 *Study selection*

2 The following *inclusion criteria* were set: 1) studies using empirical data on the use of health services;  
3 2) studies had to describe health outcomes and/or performance indicators during the COVID-19  
4 pandemic; 3) studies that are presented as original journal articles using quantitative or qualitative  
5 methods, such as cohort studies, case-control, cross-sectional designs, case reports, systematic reviews,  
6 surveys, and meta-analyses. The following *exclusion criteria* were set: 1) non-primary studies (such as  
7 editorials and commentaries); 2) prediction models; 3) clinical case reports; and 4) diseases management  
8 or health services organization guidelines; 5) studies about the impact on healthcare workers, patients  
9 diagnosed with COVID-19, children, or pregnant women; 6) studies primarily performed in non-OECD  
10 countries; 7) articles from which only an abstract was available.

11

## 12 *Methods of selection*

13 An initial screening of the retrieved studies based on title and abstract was performed independently by  
14 two researchers (ASC, OBF) using Rayyan (<https://www.rayyan.ai/>). Studies considered relevant after  
15 this phase were exported to a spreadsheet to support full-text screening, which was performed  
16 independently by three researchers (MdL, ASC, OBF). For this study only articles on cardiac diseases  
17 were analysed. The reason for exclusion of articles was recorded at this point. In case of doubt, the other  
18 co-authors were consulted, and a decision was made.

19

## 20 *Data extraction and charting*

21 Data extracted from the included articles were collated in a spreadsheet informed by a pilot on 15 studies  
22 (Supplementary material S3). Data extraction was performed independently by three researchers (MdL,  
23 ASC, OBF). Extracted data included information on generic and methodological aspects of the article  
24 (e.g., authors, title, setting), and information about the indicators reported (e.g., indicator title, and data  
25 inclusion/exclusion considerations). For every indicator, we identified the trend reported in the articles  
26 (increase/decrease/stable).

1 *Synthesis of the results*

2 The indicators and respective trends were categorised and grouped according to different phases of the  
3 hospital cardiac care pathway by MdL, followed by a review conducted by ASC (Supplementary  
4 material S4).

5

## 1 Results

2 Database searches yielded 6277 articles. Of these, 838 articles focusing on non-communicable diseases  
3 met the inclusion criteria. After full-text screening of 117 articles focused on cardiac hospital care, a  
4 total of 94 articles were included in this review (Fig. 1). Twenty-three full-text studies were excluded.

5

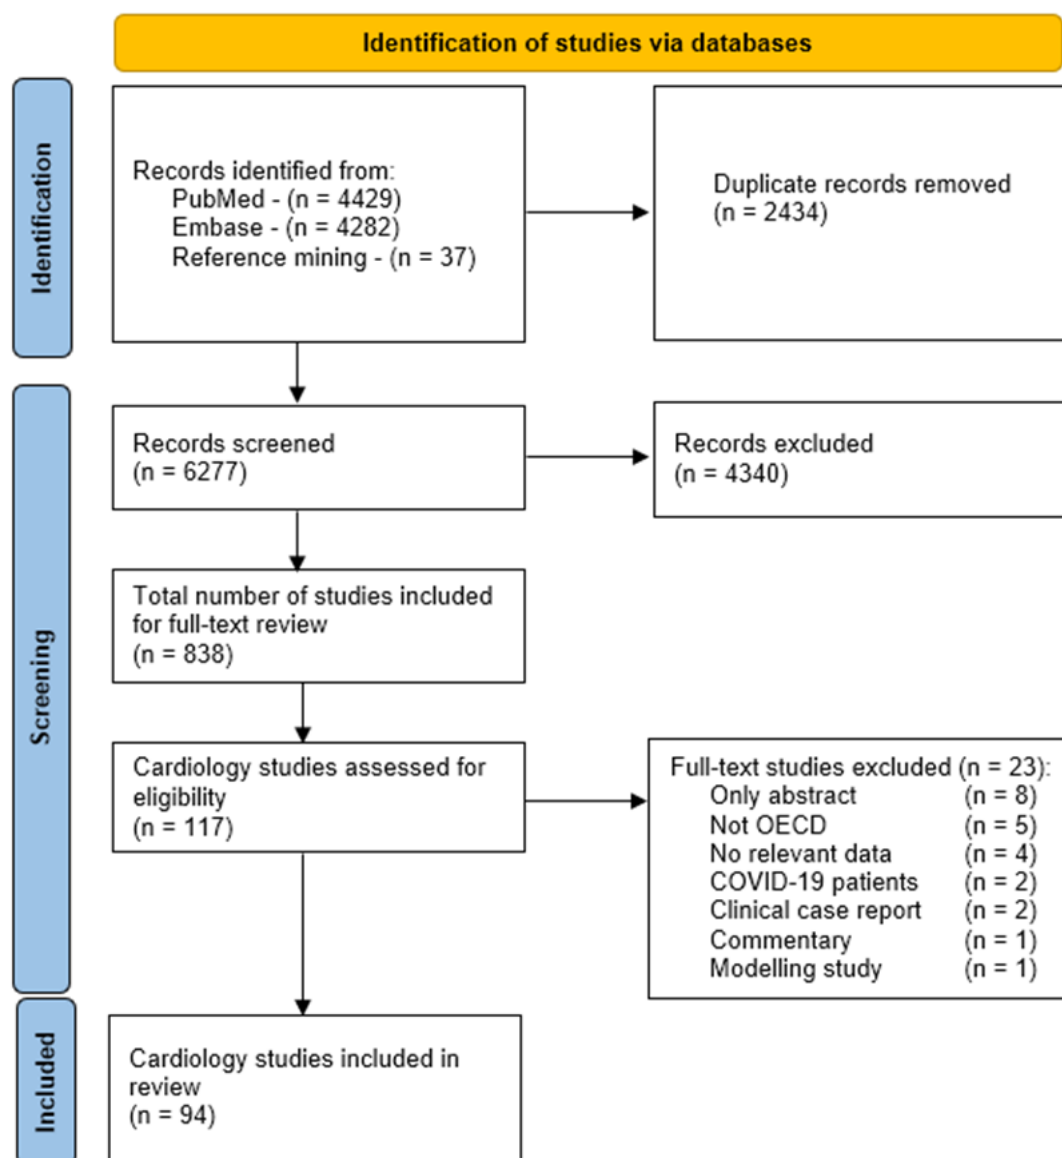

6

7 **Figure 1** - PRISMA flow diagram of the literature search. Abbreviations: OECD - Organisation for Economic Co-operation  
8 and Development.

9

10

11



1 *General characteristics of the included articles*

2 The included articles reported on 109 different countries (Fig. 2). Eighty-six articles provided  
3 information on one country only. Eight articles involved multiple countries, of which seven also  
4 included non-OECD countries. Most articles reported on Italy (n = 20, 21%), followed by the United  
5 Kingdom (n = 17, 18%), and Germany (n = 14, 15%).

6

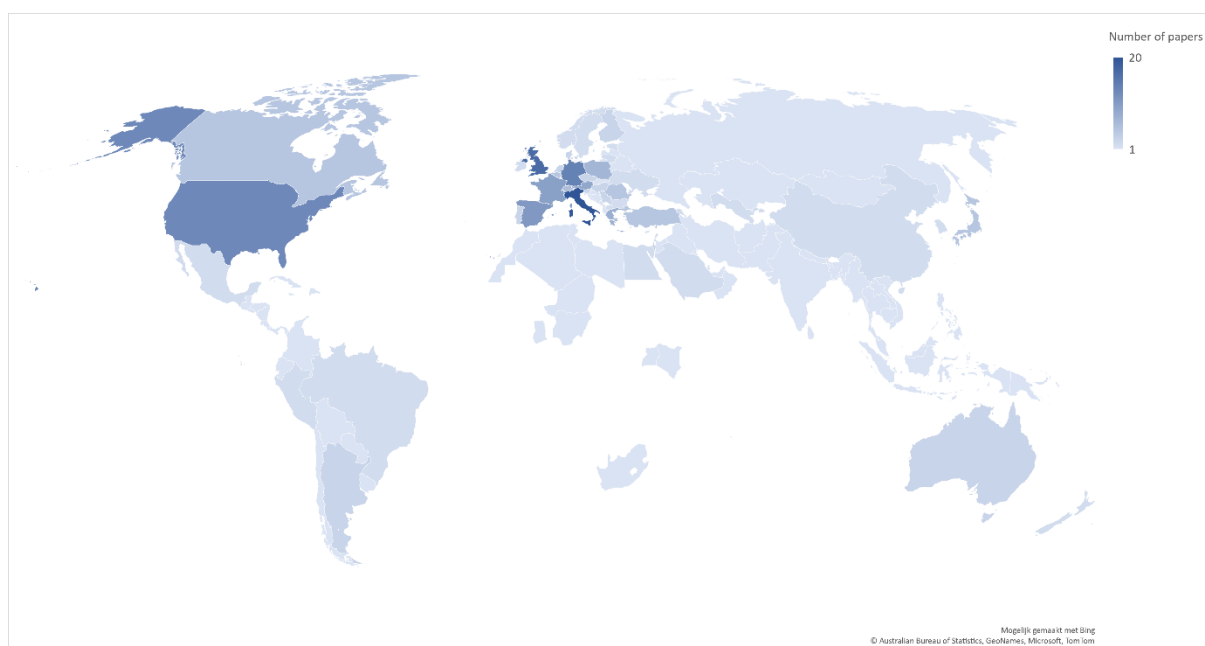

8 **Figure 2** - Countries reported on in the included articles (including articles reporting on multiple countries), colour-graded  
9 according to number of included papers (n=109)

10

11 Most of the studies used a retrospective cohort design (n = 66, 70%), other studies used a prospective  
12 cohort (n = 13, 14%), or survey design (n = 12, 13%). The included studies used three different time  
13 periods when comparing pandemic versus pre-pandemic indicators. Most studies compared a COVID-  
14 19 affected period in 2020 to the same period in the previous year (n = 54, 56%). Other studies (n = 34,  
15 36%) compared the COVID-19 affected period to a period immediately before. Lastly, a COVID-19  
16 affected period was compared to the average of the same period in several previous years (n = 27, 29%).

17

1 *Impact of COVID-19 on the hospital cardiac care pathway*

2

3 The indicators were categorised and grouped according to different phases of the hospital cardiac care  
4 pathway (Fig. 3), to visualise their combined trends.

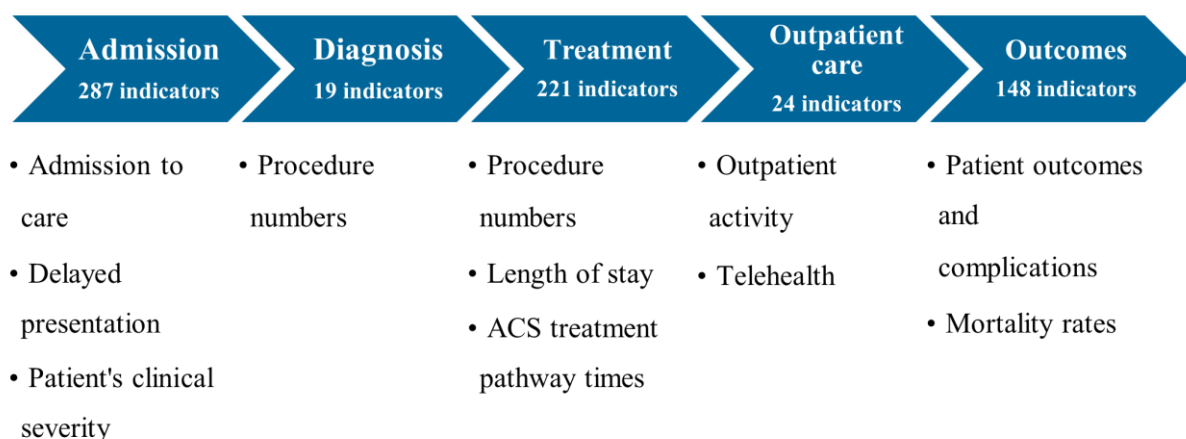

5

6 **Figure 3** - Categorisation of indicators according to different phases of the hospital cardiac care pathway. *Abbreviations:*

7 *ACS - Acute Coronary Syndrome*

8

9 **Admission**

10 A total of 287 indicators regarding the ‘admission’ phase of the hospital cardiac care pathway were  
11 identified. These indicators were grouped into three separate categories: ‘admission to care’, ‘delayed  
12 presentation’, and ‘patients’ clinical severity at presentation’.

13

14 *Admission to care*

15 Regarding numbers of admissions for cardiac diseases to hospital services, 134 indicators were  
16 identified from 49 articles (33-81). Most of the indicators concerned patients with acute coronary  
17 syndrome (ACS), heart failure, or cardiac arrhythmia. Of these indicators, 118 (88%) reported a decrease

1 in number of admissions, compared to a non-COVID-19 period, 13 indicators (9.7%) reported a stable  
2 number of admissions, whereas 3 indicators (2.2%) reported an increase in admission numbers.

3

#### 4 *Delayed presentation*

5 Regarding the patients' timing of presentation to hospital services, 17 indicators were identified from  
6 12 articles (43,50,55,68,79,82-88). All the indicators in this category reported on patients with ACS.  
7 Most indicators defined delayed presentation as more than twelve hours after symptom onset. Of these  
8 indicators, 15 (88%) reported an increase of the number of patients with a delayed presentation to  
9 hospital services for cardiac care compared to a non-COVID-19 period. One indicator (5.9%) reported  
10 a stable number of patients with a delayed presentation, and one indicator a decrease.

11

#### 12 *Patients' clinical severity*

13 Regarding the patients' clinical severity, 136 indicators were identified from 38 articles  
14 (34,38,43,44,46,48,50,53,55,57,59,61,66,68-70,73,77,79,81,83,84,87,89-103). Most of the indicators  
15 were markers for patients with ACS, such as left ventricular ejection fraction, Killip class or biomarkers  
16 at admission. Other indicators reported on heart failure and cardiac surgery. Of these indicators, 54  
17 (40%) reported a worse clinical condition at admission when compared with patients during the COVID-  
18 19 period, 72 indicators (53%) reported a stable clinical condition, and 10 indicators (7.4%) reported a  
19 better clinical condition.

20

#### 21 **Diagnosis**

22 A total of 19 indicators regarding the 'diagnosis' phase of the hospital cardiac care pathway were  
23 identified from 11 articles (49,58,61,65,71,79,81,90,104-106). All the indicators reported on the number  
24 of diagnostic procedures, including transthoracic and transoesophageal echocardiograms, non-invasive  
25 ischemia tests and coronary angiographies. Of these indicators, 18 (95%) reported a decrease during the  
26 COVID-19 period. One indicator (5.3%) reported a stable number of diagnostic procedures performed.

27

## 1 **Treatment**

2 A total of 221 indicators regarding the ‘treatment’ phase of the cardiac care pathway were identified.  
3 These indicators were grouped into three separate categories: ‘procedure numbers’, ‘length of stay’, and  
4 ‘ACS treatment pathway times’.

5

### 6 *Procedure numbers*

7 Regarding the number of treatment procedures, 79 indicators were identified from 32 articles  
8 (35,37,43,49,50,58-61,64,65,67,71,72,79,84,86-88,90,91,94,97,99,106-113). The indicators collected  
9 mainly concerned the number of percutaneous coronary interventions. Of these indicators, 64 (81%)  
10 reported a decrease in the number of treatment procedures performed during the COVID-19 period, and  
11 15 indicators (19%) reported a stable number of procedures.

12

### 13 *Length of stay*

14 Regarding the patients’ in-hospital length of stay, 36 indicators were identified from 25 articles  
15 (36,39,46,50,54,55,57,59,61,64,68,75,77,79,81-85,88,94,96,97,111,114). Most of the indicators  
16 reported on patients with ACS. Of these indicators, 21 (58%) reported a decrease in the length of stay  
17 during the COVID-19 period, 13 indicators (36%) reported a stable length of stay, and 2 indicators  
18 (5.6%) reported an increased length of stay.

19

### 20 *Acute Coronary Syndrome treatment pathway times*

21 Regarding the treatment times for ACS care, 106 indicators were identified from 35 articles  
22 (34,37,40,43,47,48,55,64,68,70,73,77,79,81-86,89-91,93-98,100-104,114,115). Treatment pathway  
23 times reported in the papers were symptom-to-contact, symptom-to-door, symptom-to-diagnosis,  
24 symptom-to-balloon (total ischaemia time), contact-to-door, contact-to-balloon, door-to-ECG, door-to-  
25 balloon, ECG-to-balloon, diagnosis-to-balloon, first medical contact-to-catheter laboratory arrival,  
26 catheter-to-puncture, catheter laboratory arrival-to-balloon, puncture-to-balloon, and procedure time. Of  
27 these indicators, 65 (61%) reported an increase in ACS treatment pathway times during the COVID-19

1 period, 37 indicators (35%) reported stable treatment pathway times, and 4 indicators (3.8%) reported  
2 decreased treatment pathway times.

3

#### 4 **Outpatient care**

5 A total of 24 indicators regarding the ‘outpatient care’ phase of the cardiac care pathway were identified.  
6 These indicators were grouped into two separate categories: ‘outpatient activity’ and ‘telehealth’.

7

##### 8 *Outpatient activity volume*

9 Regarding outpatient activity, 18 indicators were identified from 8 articles (49,60,62,81,116-119). Most  
10 of the indicators concerned only to in-person outpatient activity. Of these indicators, 17 (94%) reported  
11 a decrease in outpatient activity volume during the COVID-19 period. One indicator (5.6%) reported a  
12 stable number.

13

##### 14 *Telehealth*

15 Regarding the use of telehealth, 6 indicators were identified from 6 articles (49,62,116,117,119,120).  
16 All the indicators reported an increased use of telehealth.

17

18

19

#### 20 **Outcomes**

21 A total of 148 indicators regarding the ‘outcomes’ phase of the cardiac care pathway were identified.  
22 These indicators were grouped into two separate categories: ‘outcomes and complications’ and  
23 ‘mortality rates’.

24

##### 25 *Outcomes and complications*

26 Regarding patients’ outcomes and complications, 88 indicators were identified from 31 articles  
27 (34,37,41,47,50,55,59,66,68,70,71,73,77,82-85,89-93,96,97,100-103,111,112,119). Most indicators

1 were on patients with ACS, in particular ST-elevated myocardial infarctions (STEMI), such as left  
2 ventricular ejection fraction at discharge, Thrombolysis in Myocardial Infarction (TIMI) risk score after  
3 percutaneous coronary intervention and major adverse cardiovascular events. Of these indicators, 35  
4 (40%) reported worse outcomes during the COVID-19 period, 46 indicators (52%) reported a stable  
5 outcome, and 7 (8.0%) a better outcome.

6

### 7 *Mortality rates*

8 Regarding mortality rates, 60 indicators were identified from 37 articles (38-41,43,44,46-  
9 48,50,54,55,57,59,61,64,66-68,73,75,77,79,81,82,87,92,93,96-99,102,103,111,112,121). The  
10 indicators mainly concerned in-hospital mortality or 30-day case mortality rates. Of these indicators, 31  
11 (52%) reported an increase in mortality rates during the COVID-19 period, 26 (43%) reported stable  
12 mortality rates, and 3 indicators (5%) show decreased mortality rates.

13

14 An overview of the trends reported by the indicators in each phase of the hospital cardiac care pathway  
15 (defined as desirable, undesirable, or stable, following clinical reasoning) is shown in Fig. 4.

16

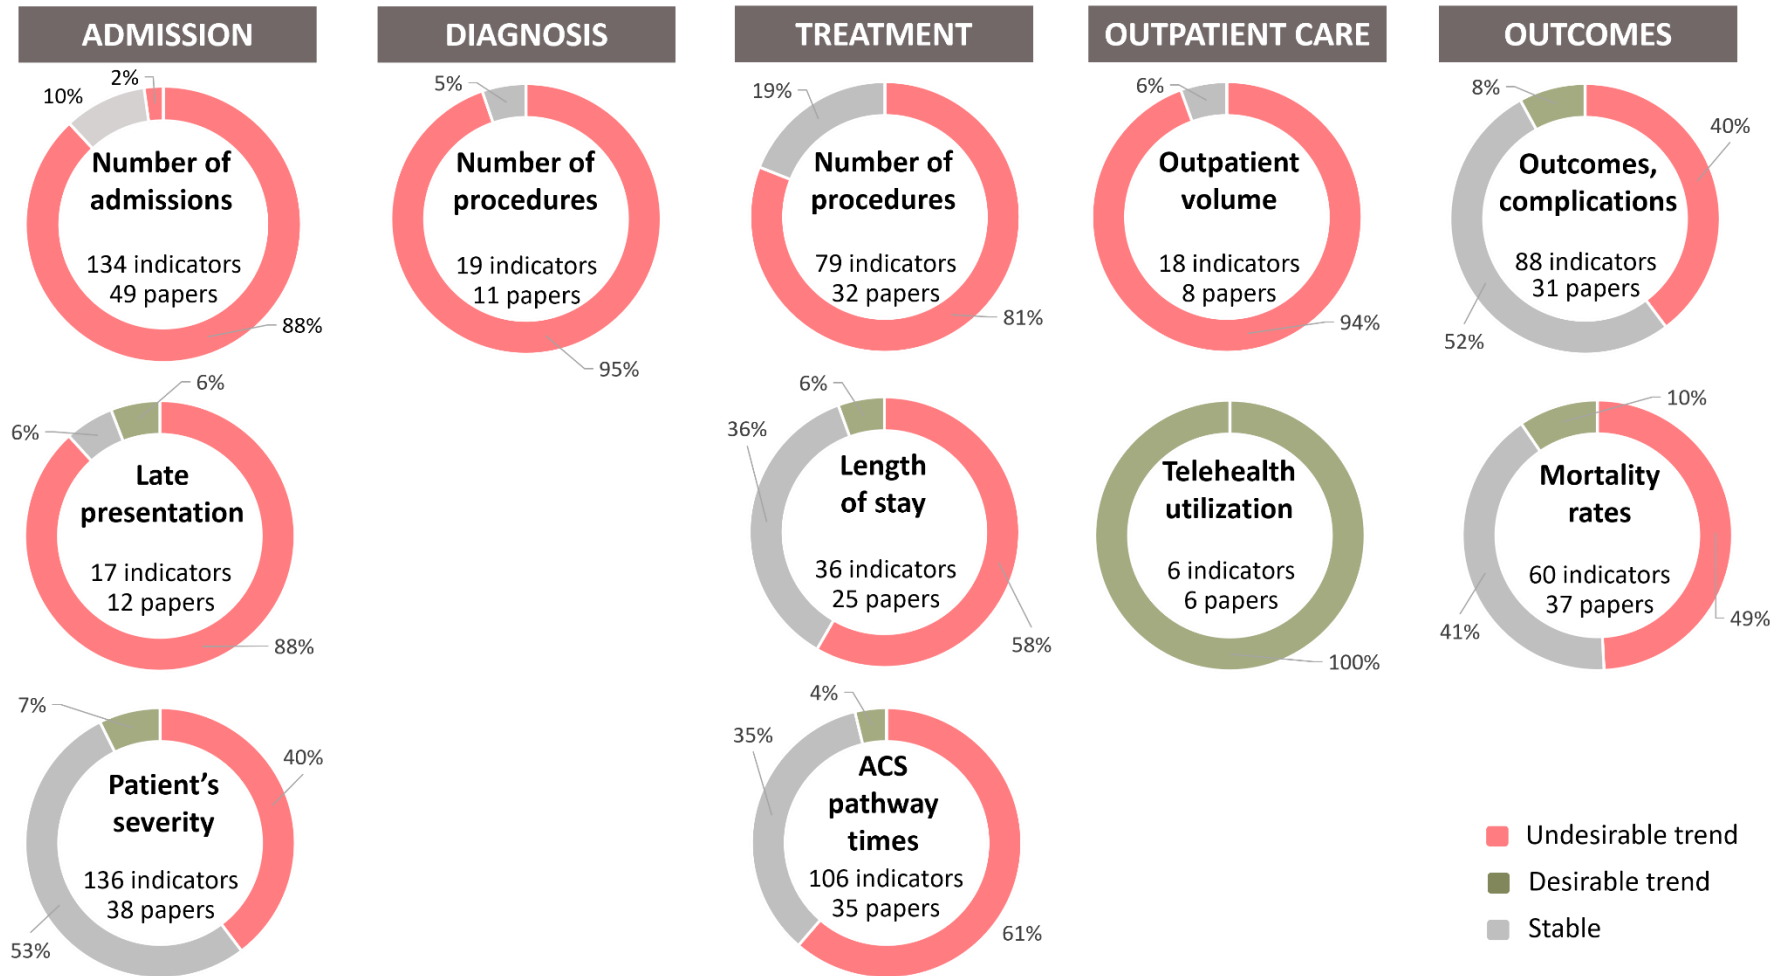

3 **Figure 4** – Hospital Cardiac Care Pathway Indicators' Trends during the COVID-19 Pandemic's early stages (Jan-Jun 2020)

## 1 **Discussion**

2 This study aimed to provide an overview of the impact of the COVID-19 pandemic on hospital services  
3 for patients with cardiac diseases. We analysed more than 1600 indicators that were used in 94 papers,  
4 reporting on 109 different countries. Our findings show that all phases of the hospital care pathway for  
5 patients with cardiac diseases (admission, diagnosis, treatment, outpatient care and outcomes) have  
6 been, in different degrees, affected during the pandemic. Admission numbers dropped substantially, and  
7 patients arrived later and in a worse clinical condition at the hospital. The number of diagnostic and  
8 treatment procedures decreased, ACS treatment pathway times increased, and patients were discharged  
9 from the hospital after a shorter length of stay. Outpatient activity decreased, whereas the use of  
10 telehealth services increased. Finally, worse clinical outcomes and an increase in mortality rates were  
11 reported. These findings can be useful to inform clinicians and policy makers on the main areas affected  
12 in the cardiac care pathway, contributing to the monitoring and improvement of health care delivery  
13 during the current pandemic and in future unexpected crises. Additionally, these results can be helpful  
14 in planning the recovery of care for patients with cardiac diseases.

15 The drop in admissions to hospital services reported in almost all included articles is probably signalling  
16 healthcare avoidance, caused by patients afraid of being infected with SARS-CoV-2 in the hospital  
17 (122). Another explanation could be an actual reduction in the incidence of cardiac diseases during the  
18 pandemic. Several explanations have been opted for this reduction in incidence, such as changes in  
19 physical activity during lockdowns or a reduction of air pollutants (123-126). Patients with cardiac  
20 diseases presenting later to the hospital and arriving in a worse clinical condition than before the  
21 pandemic could also have been caused by the fear and avoidance mentioned before, with patients waiting  
22 for longer periods before seeking care.

23 Following the drop in admission numbers and decreased outpatient activity, a decrease in the number of  
24 diagnostic and treatment procedures were to be expected. On top of patients potentially avoiding care  
25 and a possible lower incidence rate of cardiac diseases, elective procedures and surgeries were cancelled  
26 (127). These three factors together have likely contributed to reduce procedure volume. The decreased  
27 length of hospital stay that we found in most indicators is explained by several authors by a shortage of



1 hospital bed capacity or the physicians' intention to minimise the risk of patients' exposure to the virus.  
2 For instance, the European Society of Cardiology recommended that patients "should stay in the hospital  
3 for the shortest time possible" (128), and healthcare providers in the United Kingdom were advised to  
4 reduce NSTEMI inpatient stays to 36-48 hours if normal pathways could not be followed (61). The  
5 increased ACS treatment pathway times and the decreased length of stay, together, indicate that the  
6 hospital cardiac care pathway was under pressure during the COVID-19 pandemic and the delivery of  
7 care got squeezed.

8 The reduction in outpatient care volume we show in this study mostly comes from indicators reporting  
9 on in-patient visits. Therefore, it is probably an underestimation of the actual outpatient care provided.  
10 The change towards using telehealth shows that innovative measures were taken during the pandemic  
11 to avoid the risk of SARS-CoV-2 infection, and health systems adapted quickly to reach out to patients  
12 with other means than in-person consultations. In theory, strengthening the use of telehealth to provide  
13 continuity of care is beneficial. However, little is known about the quality of care provided and potential  
14 inequalities that may have risen from the use of telehealth (e.g., access for all patient groups).

15 Our findings suggest patients with cardiac conditions are showing worse outcomes and increased  
16 mortality rates during the COVID-19 pandemic. The indicators that reported changes on mortality  
17 mostly concerned short-term mortality rates (up to 30 days). An even larger impact on mortality might  
18 be found when long-term mortality rates will be assessed in later studies. These studies will have to  
19 contribute to capturing the real impact that this paper has outlined. The repercussions of care avoidance  
20 and cancelled or delayed diagnostic and treatment procedures could reveal itself in the years to come.

21 To our knowledge, this is the first scoping review that gives an overview of the impact of the COVID-  
22 19 pandemic on the hospital cardiac care pathway in OECD countries. The scoping review methodology  
23 gives the benefit of mapping the published literature that has come available during the early stages of  
24 the COVID-19 pandemic (January - June 2021). However, a scoping review has its limitations. Ideally  
25 a systematic review with meta-analyses would be performed. For the articles included in this paper this  
26 would be extremely difficult, given their different methodologies, indicators, indicators' definitions, and  
27 comparison periods. In fact, the heterogeneity in study characteristics and indicators make it hard to

1 compare data in a reliable way. In July 2020, the International Training Network for Healthcare  
2 Performance Intelligence Professionals (HealthPros) (129) suggested that to compare, manage and  
3 improve health systems responsiveness to the pandemic, commonly agreed-upon standardized data and  
4 indicators are necessary (130). We recommend devising a uniformly accepted set of indicators with  
5 clear definitions to use in future pandemics.

6 Another limitation is that only articles reporting on OECD countries were included in this scoping  
7 review. The global repercussions of the COVID-19 pandemic on hospital services for cardiac care will  
8 therefore likely be larger than reported in this paper, given the smaller capacity to handle changes in  
9 hospital care in low-income countries. On the other hand, publication bias may have played a role in  
10 portraying a more severe impact of the pandemic. Physicians might publish sooner when effects of the  
11 pandemic are being clearly noticed in their hospital. It could also be the case that the overload with  
12 clinical tasks did not allow physicians to find the time to do scientific work, which may counterbalance  
13 this limitation. Regardless, we consider our findings to be useful and signalling major trends.

14 Based on the included articles we are not able to provide an analysis of what exactly caused these  
15 changes in the hospital cardiac care pathway. Being able to contextualise these results with future  
16 research will be of use for implementing measures to improve care during the current and future  
17 pandemics or disasters. We also welcome studies on the quality and access of telemedicine during the  
18 COVID-19 pandemic. It would be relevant to study if and how this could improve quality and access of  
19 services delivery for the better, also in non-crisis times.

20

## 21 **Conclusion**

22 This study shows that all phases of the hospital care pathway for patients with cardiac diseases were  
23 affected during the COVID-19 pandemic. These results signal the hospital services delivery process for  
24 cardiac care came under pressure. Lessons should be learnt, and steps taken to be able to safeguard the  
25 continuity of care during the ongoing COVID-19 pandemic, and other crises in the future. We call for  
26 more research on monitoring and understanding the changes in hospital care. Furthermore, to guide the  
27 decisions of health system actors on the implementation of measures to ensure the continuation of

- 1 essential care during future crises, fostering the use of an international standardised set of indicators is
- 2 paramount, making optimal use of existing health information infrastructures.

1 **Supplementary data:**

2 Supplementary material S1 – Preferred Reporting Items for Systematic reviews and Meta-Analyses  
3 extension for Scoping Reviews (PRISMA-ScR) Checklist

4 Supplementary material S2 – Search strategy

5 Supplementary material S3 – Data Extraction Form

6 Supplementary material S4 – Collected and grouped indicators

7

8 **Figure Legends**

9 **Figure 2** - PRISMA flow diagram of the literature search. *Abbreviations: OECD - Organisation for*  
10 *Economic Co-operation and Development.* (821 x 876 pixel)

11 **Figure 2** - Countries reported on in the included articles (including articles reporting on multiple  
12 countries), colour-graded according to number of included papers (n=109) (3915 x 2069 pixel)

13 **Figure 3** - Categorisation of indicators according to different phases of the hospital cardiac care  
14 pathway. *Abbreviations: ACS - Acute Coronary Syndrome* (2113 x 1348 pixel)

15 **Figure 4** – Hospital Cardiac Care Pathway Indicators' Trends during the COVID-19 Pandemic's early  
16 stages (Jan-Jun 2020) (4409 x 2405 pixel)

17

18 **Acknowledgements**

19 MdL and ASC contributed equally as co-first authors to the development and execution of this study.

20 The authors wish to thank Wichor Bramer from the Erasmus MC Medical Library for developing and  
21 updating the search strategies used in this study.

22

23 **Funding**

24 This research received no specific grant from any funding agency in the public, commercial, or not-for-  
25 profit sectors. The participation of ÓBF occurred within a Marie Skłodowska-Curie Innovative Training  
26 Network (HealthPros – Healthcare Performance Intelligence Professionals) that has received funding

1 from the European Union's Horizon 2020 research and innovation programme under grant agreement  
2 Nr. 765141 (<https://healthpros-h2020.eu>).

3

#### 4 **Competing interests**

5 The authors declare that they have no competing interests.

6

#### 7 **Ethics approval and consent to participate**

8 Not required.

9

#### 10 **Availability of data and materials**

11 The data underlying this article are available in Zenodo.org, at  
12 <https://dx.doi.org/10.5281/zenodo.5745755>.

13

#### 14 **Authors' contributions**

15 All authors contributed to conceptualize the study. ASC, MdL and OBF performed the data collection.  
16 MdL performed the data analysis with collaboration and revision by ASC. MdL and ASC drafted the  
17 article. All authors provided feedback and contributed to revising the manuscript. All authors approved  
18 the final version of the manuscript.

19

20

## 1 References

- 2 1. Wu F, Zhao S, Yu B et al. A new coronavirus associated with human respiratory disease in China. *Nature (London)*  
3 2020;579:265-269.  
4 <https://www.ncbi.nlm.nih.gov/pubmed/32015508> 10.1038/s41586-020-2008-3
- 5 2. Johns Hopkins Coronavirus Resource Centre. Johns Hopkins University and Medicine, COVID-19 Map.  
6 <https://coronavirus.jhu.edu/map.html> (14-11-2021)
- 7 3. Listings of WHO's response to COVID-19.  
8 <https://www.who.int/news/item/29-06-2020-covid-timeline> (28-7-2021)
- 9 4. Haug N, Geyrhofer L, Londei A et al. Ranking the effectiveness of worldwide COVID-19 government interventions.  
10 *Nature human behaviour* 2020;4:1303-1312.  
11 <https://www.ncbi.nlm.nih.gov/pubmed/33199859> 10.1038/s41562-020-01009-0
- 12 5. Understanding Vaccination Progress by Country.  
13 <https://coronavirus.jhu.edu/vaccines/international> (27-08-2021)
- 14 6. Moghadas SM, Shoukat A, Fitzpatrick MC et al. Projecting hospital utilization during the COVID-19 outbreaks in the  
15 United States. *Proceedings of the National Academy of Sciences - PNAS* 2020;117:9122-9126.  
16 <https://www.ncbi.nlm.nih.gov/pubmed/32245814> 10.1073/pnas.2004064117
- 17 7. Moletta L, Pierobon ES, Capovilla G et al. International guidelines and recommendations for surgery during Covid-19  
18 pandemic: A Systematic Review. *International journal of surgery (London, England)* 2020;79:180-188.  
19 <https://dx.doi.org/10.1016/j.ijssu.2020.05.061> 10.1016/j.ijssu.2020.05.061
- 20 8. Temporary Emergency Guidance to US Stroke Centers During the Coronavirus Disease 2019 (COVID-19) Pandemic: On  
21 Behalf of the American Heart Association/American Stroke Association Stroke Council Leadership. *Stroke (1970)*  
22 2020;51:1910-1912.  
23 <https://www.ncbi.nlm.nih.gov/pubmed/32233972> 10.1161/STROKEAHA.120.030023
- 24 9. World Health Organization. NCDs and COVID-19.  
25 <https://www.who.int/teams/noncommunicable-diseases/covid-19> (29-7-2021)
- 26 10. Fisher L, Polonsky W, Asuni A, Jolly Y, Hessler D. The early impact of the COVID-19 pandemic on adults with type 1  
27 or type 2 diabetes: A national cohort study. *J Diabetes Complications* 2020;34:107748.10.1016/j.jdiacomp.2020.107748

- 1 11. Nakayama A, Takayama N, Kobayashi M et al. Remote cardiac rehabilitation is a good alternative of outpatient cardiac  
2 rehabilitation in the COVID-19 era. *Environ Health Prev Med* 2020;25:48.10.1186/s12199-020-00885-2
- 3 12. Nyante SJ, Benefield TS, Kuzniak CM, Earnhardt K, Pritchard M, Henderson LM. Population-level impact of  
4 coronavirus disease 2019 on breast cancer screening and diagnostic procedures. *Cancer* 2021;127:2111-  
5 2121.10.1002/cncr.33460
- 6 13. Oba A, Stoop TF, Löhr M et al. Global Survey on Pancreatic Surgery During the COVID-19 Pandemic. *Ann Surg*  
7 2020;272:e87-e93.10.1097/SLA.0000000000004006
- 8 14. Sokolski M, Gajewski P, Zymliński R et al. Impact of Coronavirus Disease 2019 (COVID-19) Outbreak on Acute  
9 Admissions at the Emergency and Cardiology Departments Across Europe. *Am J Med* 2021;134:482-  
10 489.10.1016/j.amjmed.2020.08.043
- 11 15. Weber T, Januszewicz A, Rosei E et al. The corona-virus disease 2019 pandemic compromised routine care for  
12 hypertension: a survey conducted among excellence centers of the European Society of Hypertension. *Journal of*  
13 *hypertension* 2021;39:190-195.  
14 [http://ovidsp.ovid.com/ovidweb.cgi?T=JS&NEWS=n&CSC=Y&PAGE=fulltext&D=ovft&AN=00004872-202101000-](http://ovidsp.ovid.com/ovidweb.cgi?T=JS&NEWS=n&CSC=Y&PAGE=fulltext&D=ovft&AN=00004872-202101000-00025)  
15 [00025](http://ovidsp.ovid.com/ovidweb.cgi?T=JS&NEWS=n&CSC=Y&PAGE=fulltext&D=ovft&AN=00004872-202101000-00025) 10.1097/HJH.0000000000002703
- 16 16. Roy CM, Bollman EB, Carson LM, Northrop AJ, Jackson EF, Moresky RT. Assessing the Indirect Effects of COVID-19  
17 on Healthcare Delivery, Utilization, and Health Outcomes: A Scoping Review. *European journal of public health*  
18 2021;31:634-640.  
19 <https://www.ncbi.nlm.nih.gov/pubmed/33755130> 10.1093/eurpub/ckab047
- 20 17. Lloyd MR, Stephens SJ, Hong JC et al. The impact of COVID-19 on breast cancer stage at diagnosis. *JCO* 2021;39:528-  
21 528.  
22 [https://ascopubs.org/doi/abs/10.1200/JCO.2021.39.15\\_suppl.528](https://ascopubs.org/doi/abs/10.1200/JCO.2021.39.15_suppl.528) 10.1200/JCO.2021.39.15\_suppl.528
- 23 18. Gong K, Xu Z, Cai Z, Chen Y, Wang Z. Internet Hospitals Help Prevent and Control the Epidemic of COVID-19 in  
24 China: Multicenter User Profiling Study. *Journal of medical Internet research* 2020;22:e18908.  
25 <https://www.ncbi.nlm.nih.gov/pubmed/32250962> 10.2196/18908
- 26 19. Rosenbaum L. The Untold Toll - The Pandemic's Effects on Patients without Covid-19. *N Engl J Med* 2020;382:2368-  
27 2371.10.1056/NEJMms2009984

- 1 20. Bhatia RT, Gati S, Papadakis M, Sharma S. The Impact of COVID-19 on the Continuity of Cardiovascular Care.  
2 *European Heart Journal* 2021;42:215-217.  
3 <https://doi.org/10.1093/eurheartj/ehaa742> 10.1093/eurheartj/ehaa742
- 4 21. Ball S, Banerjee A, Berry C et al. Monitoring indirect impact of COVID-19 pandemic on services for cardiovascular  
5 diseases in the UK. *Heart* 2020;106:1890-1897.10.1136/heartjnl-2020-317870
- 6 22. World Health Organization. Factsheet on Cardiovascular diseases (CVDs).  
7 [https://www.who.int/en/news-room/fact-sheets/detail/cardiovascular-diseases-\(cvds\)](https://www.who.int/en/news-room/fact-sheets/detail/cardiovascular-diseases-(cvds)) (16-8-2021)
- 8 23. OECD, The King's Fund. Is Cardiovascular Disease Slowing Improvements in Life Expectancy? 2020;
- 9 24. Kiss P, Carcel C, Hockham C, Peters SAE. The impact of the COVID-19 pandemic on the care and management of  
10 patients with acute cardiovascular disease: a systematic review. *Eur Heart J Qual Care Clin Outcomes* 2021;7:18-  
11 27.10.1093/ehjqcco/qcaa084
- 12 25. Gadella A, Sastre MÁ, Maicas C, Rodríguez-Padial L, Arias MÁ. ST-segment elevation myocardial infarction in times of  
13 COVID-19: back to the last century? A call for attention. *Rev Esp Cardiol (Engl Ed)* 2020;73:582-  
14 583.10.1016/j.rec.2020.04.009
- 15 26. Moroni F, Gramegna M, Ajello S et al. Collateral Damage: Medical Care Avoidance Behavior Among Patients With  
16 Myocardial Infarction During the COVID-19 Pandemic. *JACC Case Rep* 2020;2:1620-1624.10.1016/j.jaccas.2020.04.010
- 17 27. De Rosa S, Spaccarotella C, Basso C et al. Reduction of hospitalizations for myocardial infarction in Italy in the COVID-  
18 19 era. *Eur Heart J* 2020;41:2083-2088.10.1093/eurheartj/ehaa409
- 19 28. Cho KH, Han X, Ahn JH et al. Long-Term Outcomes of Patients With Late Presentation of ST-Segment Elevation  
20 Myocardial Infarction. *J Am Coll Cardiol* 2021;77:1859-1870.10.1016/j.jacc.2021.02.041
- 21 29. Munn Z, Peters MDJ, Stern C, Tufanaru C, McArthur A, Aromataris E. Systematic review or scoping review? Guidance  
22 for authors when choosing between a systematic or scoping review approach. *BMC medical research methodology*  
23 2018;18:143.  
24 <https://www.ncbi.nlm.nih.gov/pubmed/30453902> 10.1186/s12874-018-0611-x
- 25 30. Arksey H, O'Malley L. Scoping studies: towards a methodological framework. *International journal of social research*  
26 *methodology* 2005;8:19-32.  
27 <http://www.tandfonline.com/doi/abs/10.1080/1364557032000119616> 10.1080/1364557032000119616



- 1 31. Levac D, Colquhoun H, O'Brien KK. Scoping studies: advancing the methodology. *Implementation science : IS*  
2 2010;5:69.  
3 <https://www.ncbi.nlm.nih.gov/pubmed/20854677> 10.1186/1748-5908-5-69
- 4 32. Tricco AC, Lillie E, Zarin W et al. PRISMA Extension for Scoping Reviews (PRISMA-ScR): Checklist and Explanation.  
5 *Annals of internal medicine* 2018;169:467-473.10.7326/M18-0850
- 6 33. Alba A, Frankfurter C, Buchan T et al. REDUCED RATE OF HOSPITAL PRESENTATIONS FOR HEART FAILURE  
7 DURING THE COVID-19 PANDEMIC IN TORONTO, CANADA. *Can J Cardiol* 2020;36:S74.  
8 <https://www.ncbi.nlm.nih.gov/pmc/articles/PMC7529371/> 10.1016/j.cjca.2020.07.147
- 9 34. Araiza-Garaygordobil D, Montalto C, Martinez-Amezcuca P et al. Impact of the COVID-19 Pandemic on Hospitalizations  
10 for Acute Coronary Syndromes: a Multinational Study. *QJM* 2021;10.1093/qjmed/hcab013
- 11 35. Ball S, Banerjee A, Berry C et al. Monitoring indirect impact of COVID-19 pandemic on services for cardiovascular  
12 diseases in the UK. *Heart* 2020;106:1890-1897.10.1136/heartjnl-2020-317870
- 13 36. Bhatt AS, Moscone A, McElrath EE et al. Fewer Hospitalizations for Acute Cardiovascular Conditions During the  
14 COVID-19 Pandemic. *J Am Coll Cardiol* 2020;76:280-288.10.1016/j.jacc.2020.05.038
- 15 37. Boeddinghaus J, Nestelberger T, Kaiser C et al. Effect of COVID-19 on acute treatment of ST-segment elevation and  
16 Non-ST-segment elevation acute coronary syndrome in northwestern Switzerland. *Int J Cardiol Heart Vasc*  
17 2021;32:100686.10.1016/j.ijcha.2020.100686
- 18 38. Bollmann A, Hohenstein S, König S, Meier-Hellmann A, Kuhlen R, Hindricks G. In-hospital mortality in heart failure in  
19 Germany during the Covid-19 pandemic. *ESC Heart Failure* 2020;7:4416-4419.  
20 <https://onlinelibrary.wiley.com/doi/abs/10.1002/ehf2.13011> 10.1002/ehf2.13011
- 21 39. Bromage DI, Cannatà A, Rind IA et al. The impact of COVID-19 on heart failure hospitalization and management: report  
22 from a Heart Failure Unit in London during the peak of the pandemic. *European Journal of Heart Failure* 2020;22:978-984.  
23 <https://onlinelibrary.wiley.com/doi/abs/10.1002/ejhf.1925> 10.1002/ejhf.1925
- 24 40. Bruoha S, Yosefy C, Gallego-Colon E et al. Impact in total ischemic time and ST-segment elevation myocardial  
25 infarction admissions during COVID-19. *Am J Emerg Med* 2021;45:7-10.10.1016/j.ajem.2021.02.020
- 26 41. Bugger H, Gollmer J, Pregartner G et al. Complications and mortality of cardiovascular emergency admissions during  
27 COVID-19 associated restrictive measures. *PLoS One* 2020;15:e0239801.10.1371/journal.pone.0239801

- 1 42. Butt JH, Fosbøl EL, Gerds TA et al. All-cause mortality and location of death in patients with established cardiovascular  
2 disease before, during, and after the COVID-19 lockdown: a Danish Nationwide Cohort Study. *European Heart Journal*  
3 2021;42:1516-1523.  
4 <https://doi.org/10.1093/eurheartj/ehab028> 10.1093/eurheartj/ehab028
- 5 43. Claeys MJ, Argacha J, Collart P et al. Impact of COVID-19-related public containment measures on the ST elevation  
6 myocardial infarction epidemic in Belgium: a nationwide, serial, cross-sectional study. *Acta Cardiol* 2020;:1-  
7 7.10.1080/00015385.2020.1796035
- 8 44. Colivicchi F, Di Fusco SA, Magnanti M, Cipriani M, Imperoli G. The Impact of the Coronavirus Disease-2019 Pandemic  
9 and Italian Lockdown Measures on Clinical Presentation and Management of Acute Heart Failure. *J Card Fail* 2020;26:464-  
10 465.  
11 <https://www.ncbi.nlm.nih.gov/pmc/articles/PMC7224656/> 10.1016/j.cardfail.2020.05.007
- 12 45. De Filippo O, D'Ascenzo F, Angelini F et al. Reduced Rate of Hospital Admissions for ACS during Covid-19 Outbreak  
13 in Northern Italy. *N Engl J Med* 2020;383:88-89.10.1056/NEJMc2009166
- 14 46. Doolub G, Wong C, Hewitson L et al. Impact of COVID-19 on inpatient referral of acute heart failure: a single-centre  
15 experience from the south-west of the UK. *ESC Heart Failure* 2021;8:1691-1695.  
16 <https://onlinelibrary.wiley.com/doi/abs/10.1002/ehf2.13158> 10.1002/ehf2.13158
- 17 47. Erol MK, Kayıkçıoğlu M, Kılıçkap M et al. Treatment delays and in-hospital outcomes in acute myocardial infarction  
18 during the COVID-19 pandemic: A nationwide study. *Anatol J Cardiol* 2020;24:334-  
19 342.10.14744/AnatolJCardiol.2020.98607
- 20 48. Fabris E, Bessi R, De Bellis A et al. COVID-19 impact on ST-elevation myocardial infarction incidence rate in a Italian  
21 STEMI network: a U-shaped curve phenomenon. *Journal of Cardiovascular Medicine* 2021;22:344–349.  
22 [https://journals.lww.com/jcardiovascularmedicine/Fulltext/2021/05000/COVID\\_19\\_impact\\_on\\_ST\\_elevation\\_myocardial.3.a](https://journals.lww.com/jcardiovascularmedicine/Fulltext/2021/05000/COVID_19_impact_on_ST_elevation_myocardial.3.a)  
23 [spx](#) 10.2459/JCM.0000000000001153
- 24 49. Fersia O, Bryant S, Nicholson R et al. The impact of the COVID-19 pandemic on cardiology services. *Open Heart*  
25 2020;7:10.1136/openhrt-2020-001359
- 26 50. Fileti L, Vecchio S, Moretti C et al. Impact of the COVID-19 pandemic on coronary invasive procedures at two Italian  
27 high-volume referral centers. *J Cardiovasc Med (Hagerstown)* 2020;21:869-873.10.2459/JCM.0000000000001101

- 1 51. Folino AF, Zorzi A, Cernetti C et al. Impact of COVID-19 epidemic on coronary care unit accesses for acute coronary  
2 syndrome in Veneto region, Italy. *Am Heart J* 2020;226:26-28.  
3 <https://www.ncbi.nlm.nih.gov/pmc/articles/PMC7201234/> 10.1016/j.ahj.2020.04.021
- 4 52. Gašior M, Gierlotka M, Tycińska A et al. Effects of the coronavirus disease 2019 pandemic on the number of  
5 hospitalizations for myocardial infarction: regional differences. Population analysis of 7 million people. *Kardiol Pol*  
6 2020;78:1039-1042.10.33963/KP.15559
- 7 53. Gitt AK, Karcher AK, Zahn R, Zeymer U. Collateral damage of COVID-19-lockdown in Germany: decline of NSTEMI-  
8 ACS admissions. *Clin Res Cardiol* 2020;:1-3.  
9 <https://www.ncbi.nlm.nih.gov/pmc/articles/PMC7351542/> 10.1007/s00392-020-01705-x
- 10 54. Gluckman TJ, Wilson MA, Chiu S et al. Case Rates, Treatment Approaches, and Outcomes in Acute Myocardial  
11 Infarction During the Coronavirus Disease 2019 Pandemic. *JAMA Cardiol* 2020;5:1419-1424.10.1001/jamacardio.2020.3629
- 12 55. Gramegna M, Baldetti L, Beneduce A et al. ST-Segment-Elevation Myocardial Infarction During COVID-19 Pandemic:  
13 Insights From a Regional Public Service Healthcare Hub. *Circ Cardiovasc Interv*  
14 2020;13:e009413.10.1161/CIRCINTERVENTIONS.120.009413
- 15 56. Holy EW, Jakob P, Manka R et al. Impact of a nationwide COVID-19 lockdown on acute coronary syndrome referrals.  
16 *Cardiol J* 2020;27:633-635.  
17 <https://www.ncbi.nlm.nih.gov/pmc/articles/PMC8078978/> 10.5603/CJ.a2020.0091
- 18 57. Kapelios CJ, Siafarikas C, Bonou M, Liatis S, Barbetseas J. The effect of the COVID-19 pandemic on acute coronary  
19 syndrome hospitalizations and out-of-hospital cardiac arrest in Greece. *Public Health* 2021;191:17-  
20 19.10.1016/j.puhe.2020.12.006
- 21 58. Khalil E, Ozcan S. Comparison of the number of cardiovascular admissions before and after covid-19: Experience from  
22 Turkey. *Acta Medica Mediterranea* 2020;:2433-2437.  
23 [https://doi.org/10.19193/0393-6384\\_2020\\_4\\_378](https://doi.org/10.19193/0393-6384_2020_4_378)
- 24 59. König S, Hohenstein S, Meier-Hellmann A, Kuhlen R, Hindricks G, Bollmann A. In-hospital care in acute heart failure  
25 during the COVID-19 pandemic: insights from the German-wide Helios hospital network. *Eur J Heart Fail* 2020;22:2190-  
26 2201.10.1002/ejhf.2044
- 27 60. König S, Ueberham L, Pellissier V et al. Hospitalization deficit of in- and outpatient cases with cardiovascular diseases  
28 and utilization of cardiological interventions during the COVID-19 pandemic: Insights from the German-wide helios hospital

- 1 network. *Clinical cardiology* 2021;44:392-400.
- 2 <https://onlinelibrary.wiley.com/doi/abs/10.1002/clc.23549> 10.1002/clc.23549
- 3 61. Mafham MM, Spata E, Goldacre R et al. COVID-19 pandemic and admission rates for and management of acute  
4 coronary syndromes in England. *The Lancet* 2020;396:381-389.
- 5 [https://www.thelancet.com/journals/lancet/article/PIIS0140-6736\(20\)31356-8/abstract](https://www.thelancet.com/journals/lancet/article/PIIS0140-6736(20)31356-8/abstract) 10.1016/S0140-6736(20)31356-8
- 6 62. MCILVENNAN CK, ALLEN LA, DEVORE AD, GRANGER CB, KALTENBACH LA, GRANGER BB. Changes in  
7 Care Delivery for Patients With Heart Failure During the COVID-19 Pandemic: Results of a Multicenter Survey. *J Card Fail*  
8 2020;26:635-636.
- 9 <https://www.ncbi.nlm.nih.gov/pmc/articles/PMC7272147/> 10.1016/j.cardfail.2020.05.019
- 10 63. Moreno R, Alonso JJ, Caballero R et al. Age and Gender influence on time of arrival for STEMI patients during Covid-  
11 19 pandemic. *Am J Emerg Med* 2021;42:244-245.
- 12 <https://www.ncbi.nlm.nih.gov/pmc/articles/PMC7274966/> 10.1016/j.ajem.2020.06.013
- 13 64. Nef HM, Elsässer A, Möllmann H et al. Impact of the COVID-19 pandemic on cardiovascular mortality and catheterization  
14 activity during the lockdown in central Germany: an observational study. *Clin Res Cardiol* 2021;110:292-  
15 301.10.1007/s00392-020-01780-0
- 16 65. Negreira Caamaño M, Piqueras Flores J, Mateo Gómez C. Impact of COVID-19 pandemic in cardiology admissions. *Med*  
17 *Clin (Engl Ed)* 2020;155:179-180.
- 18 <https://www.ncbi.nlm.nih.gov/pmc/articles/PMC7381901/> 10.1016/j.medcle.2020.05.006
- 19 66. Papafaklis MI, Katsouras CS, Tsigkas G et al. "Missing" acute coronary syndrome hospitalizations during the COVID-19  
20 era in Greece: Medical care avoidance combined with a true reduction in incidence? *Clin Cardiol* 2020;43:1142-  
21 1149.10.1002/clc.23424
- 22 67. Pinto RD, Ferri C, Mammarella L et al. Increased cardiovascular death rates in a COVID-19 low prevalence area. *The*  
23 *Journal of Clinical Hypertension* 2020;22:1932-1935.
- 24 <https://onlinelibrary.wiley.com/doi/abs/10.1111/jch.14013> 10.1111/jch.14013
- 25 68. Primessnig U, Pieske BM, Sherif M. Increased mortality and worse cardiac outcome of acute myocardial infarction  
26 during the early COVID-19 pandemic. *ESC Heart Failure* 2021;8:333-343.
- 27 <https://onlinelibrary.wiley.com/doi/abs/10.1002/ehf2.13075> 10.1002/ehf2.13075

- 1 69. Rattka M, Baumhardt M, Dreyhaupt J et al. 31 days of COVID-19-cardiac events during restriction of public life-a  
2 comparative study. *Clinical research in cardiology* 2020;109:1476-1482.  
3 <https://www.ncbi.nlm.nih.gov/pubmed/32494921> 10.1007/s00392-020-01681-2
- 4 70. Reinstadler SJ, Reindl M, Lechner I et al. Effect of the COVID-19 Pandemic on Treatment Delays in Patients with ST-  
5 Segment Elevation Myocardial Infarction. *J Clin Med* 2020;9  
6 <https://www.ncbi.nlm.nih.gov/pmc/articles/PMC7408681/> 10.3390/jcm9072183
- 7 71. Roffi M, Capodanno D, Windecker S, Baumbach A, Dudek D. Impact of the COVID-19 pandemic on interventional  
8 cardiology practice: results of the EAPCI survey. *EuroIntervention* 2020;16:247-250.10.4244/EIJ-D-20-00528
- 9 72. Schnaubelt S, Domanovits H, Niederdoeckl J et al. The Impact of the COVID-19 Pandemic on Incidences of Atrial  
10 Fibrillation and Electrical Cardioversion at a Tertiary Care Emergency Department: An Inter- and Intra-year Analysis. *Front*  
11 *Med (Lausanne)* 2020;7:595881.10.3389/fmed.2020.595881
- 12 73. Secco GG, Zocchi C, Parisi R et al. Decrease and Delay in Hospitalization for Acute Coronary Syndromes During the  
13 2020 SARS-CoV-2 Pandemic. *Canadian Journal of Cardiology* 2020;36:1152-1155.  
14 <https://www.sciencedirect.com/science/article/pii/S0828282X2030502X> 10.1016/j.cjca.2020.05.023
- 15 74. Singh S, Fong HK, Desai R, Zwinderman AH. Impact of COVID-19 on acute coronary syndrome-related  
16 hospitalizations: A pooled analysis. *Int J Cardiol Heart Vasc* 2021;32  
17 <https://www.ncbi.nlm.nih.gov/pmc/articles/PMC7836359/> 10.1016/j.ijcha.2021.100718
- 18 75. Sokolski M, Gajewski P, Zymliński R et al. Impact of Coronavirus Disease 2019 (COVID-19) Outbreak on Acute  
19 Admissions at the Emergency and Cardiology Departments Across Europe. *Am J Med* 2021;134:482-  
20 489.10.1016/j.amjmed.2020.08.043
- 21 76. Solomon MD, McNulty EJ, Rana JS et al. The Covid-19 Pandemic and the Incidence of Acute Myocardial Infarction. *N*  
22 *Engl J Med* 2020;383:691-693.10.1056/NEJMc2015630
- 23 77. Tomasoni D, Adamo M, Italia L et al. Impact of COVID-2019 outbreak on prevalence, clinical presentation and  
24 outcomes of ST-elevation myocardial infarction. *J Cardiovasc Med (Hagerstown)* 2020;21:874-  
25 881.10.2459/JCM.0000000000001098
- 26 78. Vassilikos VP, Pagourelas ED, Katsos K et al. Impact of social containment measures on cardiovascular admissions and  
27 sudden cardiac death rates during Coronavirus Disease (COVID-19) outbreak in Greece. *Hellenic J Cardiol* 2020;  
28 <https://www.ncbi.nlm.nih.gov/pmc/articles/PMC7491429/> 10.1016/j.hjc.2020.09.009

- 1 79. Vecchio S, Fileti L, Reggi A, Moschini C, Lorenzetti S, Rubboli A. Impact of the COVID-19 pandemic on admissions for  
2 acute coronary syndrome: review of the literature and single-center experience. *G Ital Cardiol (Rome)* 2020;21:502-  
3 508.10.1714/3386.33635
- 4 80. Vest AR, Upshaw JN, Dean K et al. The Decrease in Hospitalizations For Heart Failure During the Covid-19 Pandemic:  
5 A Community and Academic Hospital Comparison Study. *J Card Fail* 2020;26:S71.  
6 <https://www.ncbi.nlm.nih.gov/pmc/articles/PMC7527197/> 10.1016/j.cardfail.2020.09.207
- 7 81. Wu J, Mamas M, Rashid M et al. Patient response, treatments, and mortality for acute myocardial infarction during the  
8 COVID-19 pandemic. *European Heart Journal - Quality of Care and Clinical Outcomes* 2021;7:238-246.  
9 <https://doi.org/10.1093/ehjqcco/qcaa062> 10.1093/ehjqcco/qcaa062
- 10 82. Aldujeli A, Hamadeh A, Briedis K et al. Delays in Presentation in Patients With Acute Myocardial Infarction During the  
11 COVID-19 Pandemic. *Cardiol Res* 2020;11:386-391.10.14740/cr1175
- 12 83. Hammad TA, Parikh M, Tashtish N et al. Impact of COVID-19 pandemic on ST-elevation myocardial infarction in a  
13 non-COVID-19 epicenter. *Catheter Cardiovasc Interv* 2021;97:208-214.10.1002/ccd.28997
- 14 84. Kitahara S, Fujino M, Honda S et al. COVID-19 pandemic is associated with mechanical complications in patients with  
15 ST-elevation myocardial infarction. *Open Heart* 2021;810.1136/openhrt-2020-001497
- 16 85. Perrin N, Iglesias JF, Rey F et al. Impact of the COVID-19 pandemic on acute coronary syndromes. *Swiss Med Wkly*  
17 2020;150:w20448.10.4414/smw.2020.20448
- 18 86. Toner L, Koshy AN, Hamilton GW, Clark D, Farouque O, Yudi MB. Acute coronary syndromes undergoing  
19 percutaneous coronary intervention in the COVID-19 era: comparable case volumes but delayed symptom onset to hospital  
20 presentation. *Eur Heart J Qual Care Clin Outcomes* 2020;6:225-226.10.1093/ehjqcco/qcaa038
- 21 87. Wilson SJ, Connolly MJ, Elghamry Z et al. Effect of the COVID-19 Pandemic on ST-Segment-Elevation Myocardial  
22 Infarction Presentations and In-Hospital Outcomes. *Circ Cardiovasc Interv*  
23 2020;13:e009438.10.1161/CIRCINTERVENTIONS.120.009438
- 24 88. Yong CM, Ang L, Welt FGP et al. Cardiac procedural deferral during the coronavirus (COVID-19) pandemic. *Catheter*  
25 *Cardiovasc Interv* 2020;96:1080-1086.10.1002/ccd.29262

- 1 89. Barbieri L, Tumminello G, Lucreziotti S et al. Mortality in STEMI Patients During the COVID Era: Has the Pandemic  
2 Changed Our Clinical Practice? *Cardiovasc Revasc Med* 2021;22:120-121.  
3 <https://www.ncbi.nlm.nih.gov/pmc/articles/PMC7488593/> 10.1016/j.carrev.2020.09.014
- 4 90. Chen Y, Rathod KS, Hamshere S et al. COVID-19 and changes in activity and treatment of ST elevation MI from a UK  
5 cardiac centre. *Int J Cardiol Heart Vasc* 2021;33:100736.10.1016/j.ijcha.2021.100736
- 6 91. De Luca G, Cercek M, Jensen LO et al. Impact of COVID-19 pandemic and diabetes on mechanical reperfusion in  
7 patients with STEMI: insights from the ISACS STEMI COVID 19 Registry. *Cardiovasc Diabetol*  
8 2020;19:215.10.1186/s12933-020-01196-0
- 9 92. De Rosa S, Spaccarotella C, Basso C et al. Reduction of hospitalizations for myocardial infarction in Italy in the COVID-  
10 19 era. *Eur Heart J* 2020;41:2083-2088.10.1093/eurheartj/ehaa409
- 11 93. Haddad K, Potter BJ, Matteau A, Gobeil F, Mansour S. Implications of COVID-19 on Time-Sensitive STEMI Care: A  
12 Report From a North American Epicenter. *Cardiovasc Revasc Med* 2021;30:33-37.10.1016/j.carrev.2020.09.024
- 13 94. Hannan EL, Wu Y, Cozzens K et al. Percutaneous Coronary Intervention for ST-Elevation Myocardial Infarction Before  
14 and During COVID in New York. *Am J Cardiol* 2021;142:25-34.10.1016/j.amjcard.2020.11.033
- 15 95. Hauguel-Moreau M, Pillière R, Prati G et al. Impact of Coronavirus Disease 2019 outbreak on acute coronary syndrome  
16 admissions: four weeks to reverse the trend. *J Thromb Thrombolysis* 2020;:1-2.  
17 <https://www.ncbi.nlm.nih.gov/pmc/articles/PMC7323878/> 10.1007/s11239-020-02201-9
- 18 96. Kobo O, Efraim R, Saada M et al. The impact of lockdown enforcement during the SARSCoV-2 pandemic on the timing  
19 of presentation and early outcomes of patients with ST-elevation myocardial infarction. *PLoS One*  
20 2020;15:e0241149.10.1371/journal.pone.0241149
- 21 97. Kwok CS, Gale CP, Kinnaird T et al. Impact of COVID-19 on percutaneous coronary intervention for ST-elevation  
22 myocardial infarction. *Heart* 2020;106:1805-1811.10.1136/heartjnl-2020-317650
- 23 98. Little CD, Kotecha T, Candilio L et al. COVID-19 pandemic and STEMI: pathway activation and outcomes from the  
24 pan-London heart attack group. *Open Heart* 2020;710.1136/openhrt-2020-001432
- 25 99. Nader J, Anselmi A, Tomasi J et al. Adult cardiac surgery during COVID-19 lockdown: Impact on activity and outcomes  
26 in a high-volume centre. *Arch Cardiovasc Dis* 2021;114:364-370.10.1016/j.acvd.2020.12.003

- 1 100. Pascual Calleja I, Álvarez Velasco R, Almendarez Lacayo M, Arboine Aguirre L, Avanzas Fernández P, Moris de la  
2 Tassa, César. Impact of the COVID-19 pandemic on acute myocardial infarction care times. *Emergencias* 2020;32:440-442.
- 3 101. Popovic B, Varlot J, Metzdorf PA, Jeulin H, Goehringer F, Camenzind E. Changes in characteristics and management  
4 among patients with ST-elevation myocardial infarction due to COVID-19 infection. *Catheter Cardiovasc Interv*  
5 2021;97:E319-E326.10.1002/ccd.29114
- 6 102. Rodríguez-Leor O, Cid-Álvarez B, Pérez de Prado A et al. Impact of COVID-19 on ST-segment elevation myocardial  
7 infarction care. The Spanish experience. *Rev Esp Cardiol (Engl Ed)* 2020;73:994-1002.10.1016/j.rec.2020.08.002
- 8 103. Scholz KH, Lengenfelder B, Thilo C et al. Impact of COVID-19 outbreak on regional STEMI care in Germany. *Clin*  
9 *Res Cardiol* 2020;109:1511-1521.10.1007/s00392-020-01703-z
- 10 104. Garcia S, Stanberry L, Schmidt C et al. Impact of COVID-19 pandemic on STEMI care: An expanded analysis from the  
11 United States. *Catheter Cardiovasc Interv* 2021;98:217-222.10.1002/ccd.29154
- 12 105. Nappi C, Megna R, Acampa W et al. Effects of the COVID-19 pandemic on myocardial perfusion imaging for ischemic  
13 heart disease. *Eur J Nucl Med Mol Imaging* 2020;:1-7.  
14 <https://www.ncbi.nlm.nih.gov/pmc/articles/PMC7417201/> 10.1007/s00259-020-04994-6
- 15 106. Quadri G, Rognoni A, Cerrato E et al. Catheterization laboratory activity before and during COVID-19 spread: A  
16 comparative analysis in Piedmont, Italy, by the Italian Society of Interventional Cardiology (GISE). *Int J Cardiol*  
17 2021;323:288-291.10.1016/j.ijcard.2020.08.072
- 18 107. Casey L, Khan N, Healy DG. The impact of the COVID-19 pandemic on cardiac surgery and transplant services in  
19 Ireland's National Centre. *Ir J Med Sci* 2020;:1-5.  
20 <https://www.ncbi.nlm.nih.gov/pmc/articles/PMC7335226/> 10.1007/s11845-020-02292-6
- 21 108. Elliott JM, Crozier IG. Decreases in cardiac catheter laboratory workload during the COVID-19 level 4 lockdown in  
22 New Zealand. *Intern Med J* 2020;50:1000-1003.10.1111/imj.14922
- 23 109. Iafrancesco M, Farina P, Bruno P et al. Impact of Covid-19 Pandemia on Provision of Surgical Treatment for Patients  
24 With Cardiovascular Disease. *Circulation* 2020;142:A15347-A15347.  
25 [https://www.ahajournals.org/doi/abs/10.1161/circ.142.suppl\\_3.15347](https://www.ahajournals.org/doi/abs/10.1161/circ.142.suppl_3.15347) 10.1161/circ.142.suppl\_3.15347



- 1 110. Ishii H, Amano T, Yamaji K, Kohsaka S, Yokoi H, Ikari Y. Implementation of Percutaneous Coronary Intervention  
2 During the COVID-19 Pandemic in Japan - Nationwide Survey Report of the Japanese Association of Cardiovascular  
3 Intervention and Therapeutics for Cardiovascular Disease. *Circ J* 2020;84:2185-2189.10.1253/circj.CJ-20-0708
- 4 111. Kwok CS, Gale CP, Curzen N et al. Impact of the COVID-19 Pandemic on Percutaneous Coronary Intervention in  
5 England: Insights From the British Cardiovascular Intervention Society PCI Database Cohort. *Circ Cardiovasc Interv*  
6 2020;13:e009654.10.1161/CIRCINTERVENTIONS.120.009654
- 7 112. Mohamed MO, Kinnaird T, Curzen N et al. In-Hospital and 30-Day Mortality After Percutaneous Coronary Intervention  
8 in England in the Pre-COVID and COVID Eras. *J Invasive Cardiol* 2021;33:E206-E219.
- 9 113. Rodríguez-Caulo EA, Carnero Alcázar M, Garrido Jiménez JM, Barquero Aroca JM. National survey: Impact of  
10 COVID-19 on cardiovascular surgery services in Spain (SECCE-COVID19 Study. *Cirugía Cardiovascular* 2021;28:67-70.  
11 <https://www.sciencedirect.com/science/article/pii/S1134009621000164> 10.1016/j.circv.2021.01.003
- 12 114. Soylyu K, Coksevim M, Yanik A, Bugra Cerik I, Aksan G. Effect of Covid-19 pandemic process on STEMI patients  
13 timeline. *Int J Clin Pract* 2021;75:e14005.10.1111/ijcp.14005
- 14 115. Rebolal-Leal F, Aldama-López G, Flores-Ríos X et al. Impact of COVID-19 outbreak and public lockdown on ST-  
15 segment elevation myocardial infarction care in Spain. *Cardiol J* 2020;27:425-426.10.5603/CJ.a2020.0098
- 16 116. Einstein AJ, Shaw LJ, Hirschfeld C et al. International Impact of COVID-19 on the Diagnosis of Heart Disease. *J Am*  
17 *Coll Cardiol* 2021;77:173-185.10.1016/j.jacc.2020.10.054
- 18 117. European Society of Hypertension Corona-virus Disease 19 Task Force. The corona-virus disease 2019 pandemic  
19 compromised routine care for hypertension: a survey conducted among excellence centers of the European Society of  
20 Hypertension. *J Hypertens* 2021;39:190-195.10.1097/HJH.0000000000002703
- 21 118. Sankaranarayanan R, Hartshorne-Evans N, Redmond-Lyon S et al. The impact of COVID-19 on the management of  
22 heart failure: a United Kingdom patient questionnaire study. *ESC Heart Fail* 2021;8:1324-1332.10.1002/ehf2.13209
- 23 119. Wosik J, Clowse MEB, Overton R et al. Impact of the COVID-19 pandemic on patterns of outpatient cardiovascular  
24 care. *Am Heart J* 2021;231:1-5.10.1016/j.ahj.2020.10.074
- 25 120. Chagué F, Boulin M, Eicher J et al. Impact of lockdown on patients with congestive heart failure during the coronavirus  
26 disease 2019 pandemic. *ESC Heart Fail* 2020;10.1002/ehf2.13016

- 1 121. Wadhera RK, Shen C, Gondi S, Chen S, Kazi DS, Yeh RW. Cardiovascular Deaths During the COVID-19 Pandemic in  
2 the United States. *J Am Coll Cardiol* 2021;77:159-169.10.1016/j.jacc.2020.10.055
- 3 122. Czeisler MÉ. Delay or Avoidance of Medical Care Because of COVID-19–Related Concerns — United States, June  
4 2020. *MMWR Morb Mortal Wkly Rep* 2020;69  
5 <https://www.cdc.gov/mmwr/volumes/69/wr/mm6936a4.htm> 10.15585/mmwr.mm6936a4
- 6 123. Al-Kindi SG, Brook RD, Biswal S, Rajagopalan S. Environmental determinants of cardiovascular disease: lessons  
7 learned from air pollution. *Nat Rev Cardiol* 2020;17:656-672.  
8 <https://www.nature.com/articles/s41569-020-0371-2> 10.1038/s41569-020-0371-2
- 9 124. Venter ZS, Aunan K, Chowdhury S, Lelieveld J. COVID-19 lockdowns cause global air pollution declines. *Proc Natl*  
10 *Acad Sci U S A* 2020;117:18984-18990.10.1073/pnas.2006853117
- 11 125. Krumholz M.D. HM. Where Have All the Heart Attacks Gone? *The New York Times* 2020;  
12 [https://www.nytimes.com/2020/04/06/well/live/coronavirus-doctors-hospitals-emergency-care-heart-attack-](https://www.nytimes.com/2020/04/06/well/live/coronavirus-doctors-hospitals-emergency-care-heart-attack-stroke.html)  
13 [stroke.html](https://www.nytimes.com/2020/04/06/well/live/coronavirus-doctors-hospitals-emergency-care-heart-attack-stroke.html)
- 14 126. Coronavirus doctor's diary: Is lockdown good for your heart? *BBC News* 2020;  
15 <https://www.bbc.com/news/health-52535044>
- 16 127. Harky A, Harrington D, Nawaytou O et al. COVID-19 and cardiac surgery: The perspective from United Kingdom. *J*  
17 *Card Surg* 2020;  
18 <https://www.ncbi.nlm.nih.gov/pmc/articles/PMC7537188/> 10.1111/jocs.15039
- 19 128. The European Society for Cardiology. ESC Guidance for the Diagnosis and Management of CV Disease during the  
20 COVID-19 Pandemic.  
21 <https://www.escardio.org/Education/COVID-19-and-Cardiology/ESC-COVID-19-Guidance>,  
22 <https://www.escardio.org/Education/COVID-19-and-Cardiology/ESC-COVID-19-Guidance> (13-10-2021)
- 23 129. HealthPros network.  
24 <https://www.healthpros-h2020.eu/index.php/output> (23-08-2021)
- 25 130. Kringos D, Carinci F, Barbazza E et al. Managing COVID-19 within and across health systems: why we need  
26 performance intelligence to coordinate a global response. *Health Res Policy Syst* 2020;18:80.10.1186/s12961-020-00593-x
- 27
